# Supplementary material for: Evaluation of Saliva as a Matrix for RT-PCR Analysis and Two Rapid Antigen Tests for the Detection of SARS-CoV-2
Source: MDPI journal article supplement (doi:10.3390/v14091931), 2022-08-30
Supplement: s1 [file s1]

## Supplementary materials

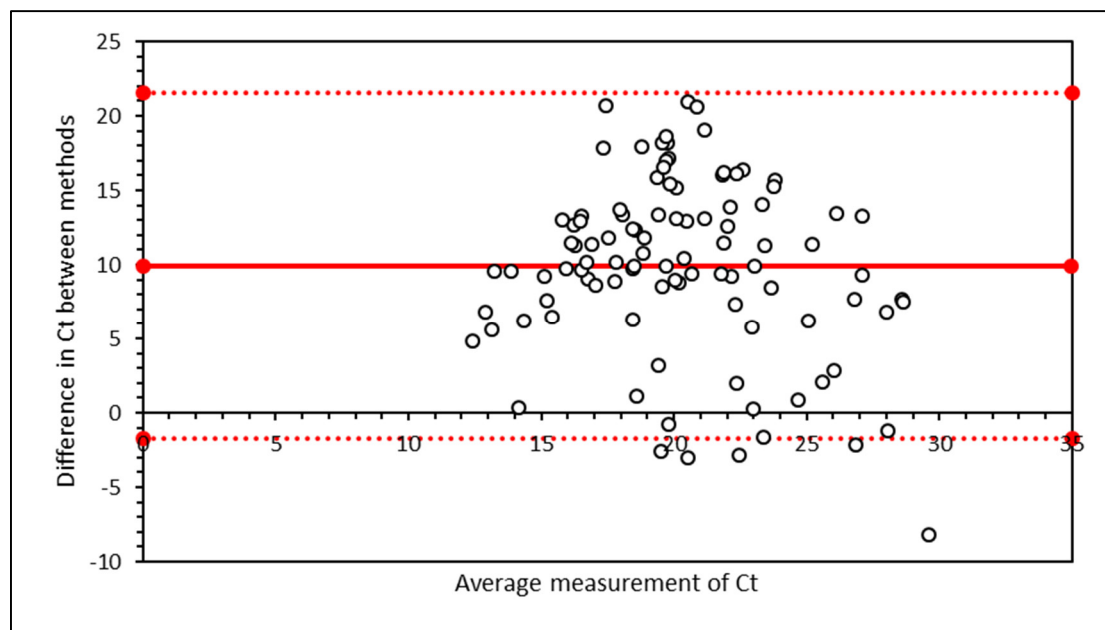

**Figure S1** Bland-Altman plot of Ct values measured for the *N* target in ORAcollect samples versus nasopharyngeal samples for samples with concordant results. The full line represents the average difference measured between both methods (9.9 Ct) and the dotted lines represent the 95% confidence limits [-2.3, 20.5].

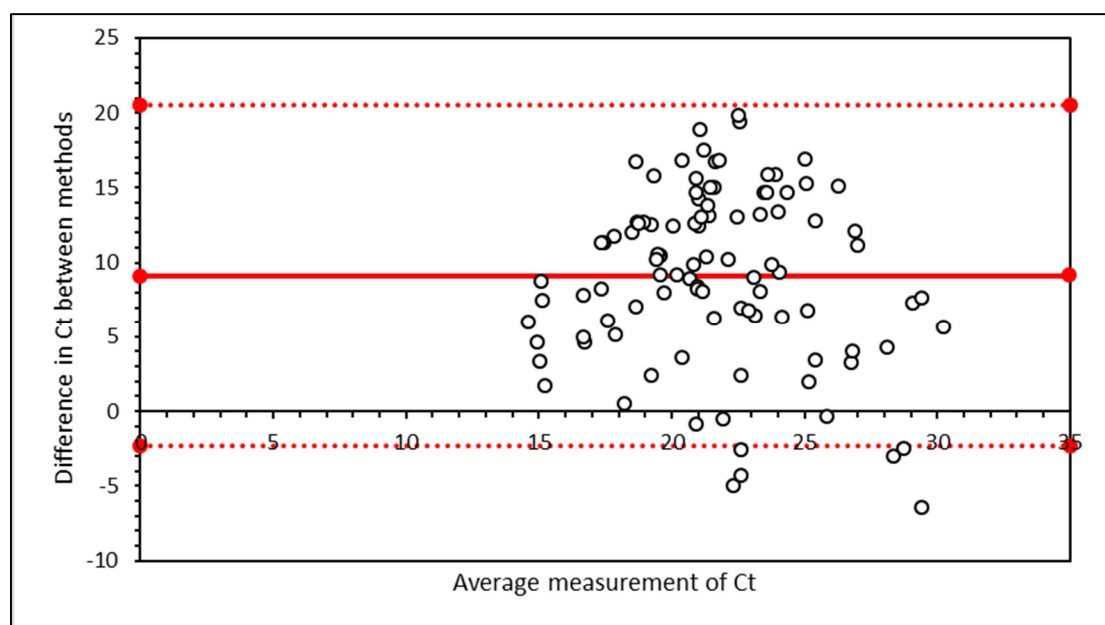

**Figure S2** Bland-Altman plot of Ct values measured for the *ORF1ab* target in ORAcollect samples versus nasopharyngeal samples with concordant results. The full line represents the average difference measured between both methods (9.1 Ct) and the dotted lines represent the 95% confidence limits [-1.7, 21.6].

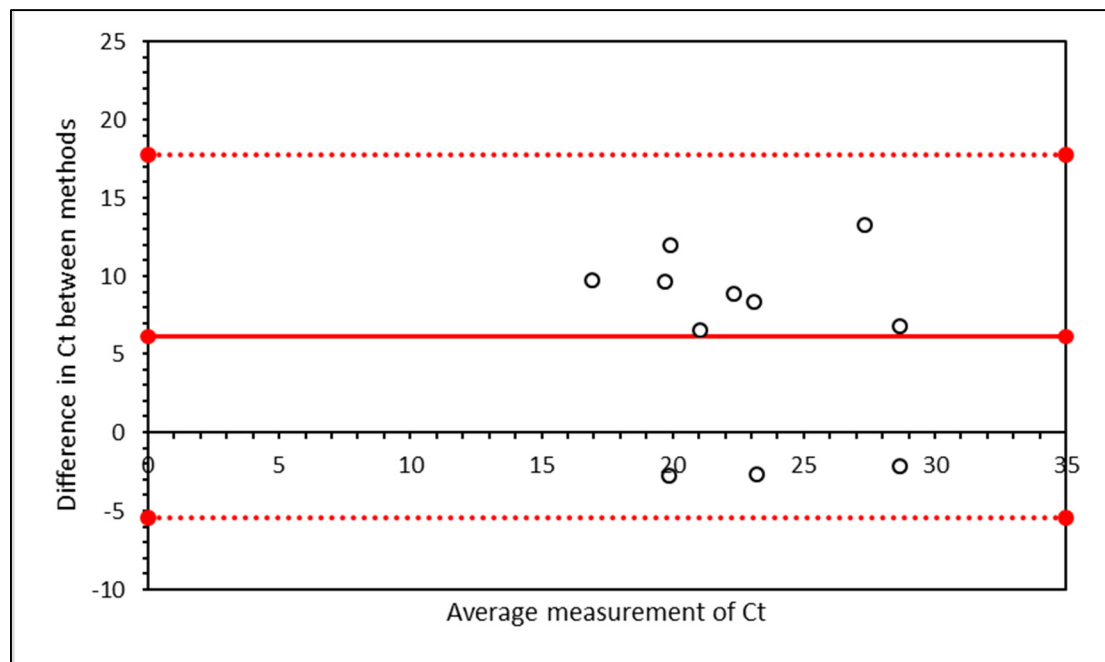

**Figure S3** Bland-Altman plot of Ct values measured for the *S* target in ORAcollect samples versus in nasopharyngeal samples with concordant results. The full line represents the average difference measured between both methods (6.2 Ct) and the dotted lines represent the 95% confidence limits [-5.4, 17.7].
